# Supplementary material
Source: PubMed Central journal article supplement (PMC4077933)
Supplement: NIHMS592907-supplement-Supp_TableS1___FigureS1-S3.pdf [file NIHMS592907-supplement-Supp_TableS1___FigureS1-S3.pdf]

**Supporting Information (SI)**

**Accumulation of heptaprenyl diphosphate sensitizes *Bacillus subtilis* to bacitracin:  
Implications for the mechanism of resistance mediated by the BceAB transporter**

Anthony W. Kingston<sup>1</sup>, Heng Zhao<sup>1</sup>, Gregory M. Cook<sup>2</sup>, and John D. Helmann<sup>1\*</sup>

short title: heptaprenyl diphosphate sensitizes *Bacillus subtilis* to bacitracin

**Author Affiliations:**

<sup>1</sup>*Department of Microbiology, Cornell University, Ithaca, NY 14853-8101, USA*

<sup>2</sup>*Department of Microbiology and Immunology, Otago School of Medical Sciences, University of Otago, PO Box 56, Dunedin 9054, New Zealand.*

**Table S1:** Bacterial strains, plasmids, and oligos used in this study.<sup>a</sup>

| Strain                            | Genotype or description                                             | Source, reference, or construction <sup>1</sup> |
|-----------------------------------|---------------------------------------------------------------------|-------------------------------------------------|
| <b><i>B. subtilis</i> strains</b> |                                                                     |                                                 |
| 168                               | <i>trpC2</i>                                                        | Lab Stock                                       |
| CU1065                            | <i>trpC2 attSPβ</i>                                                 | Lab Stock                                       |
| HB0800                            | NCBI3610 ( <i>trp</i> <sup>+</sup> )                                | Lab Stock                                       |
| HB0106                            | CU1065 <i>bcrC-pMUTIN</i> (MLS)                                     | (Cao and Helmann, 2002)                         |
| HB0928                            | 168 <i>bceAB::kan</i>                                               | (Mascher <i>et al.</i> , 2003)                  |
| HB13129                           | 168 <i>ytpA::MLS</i>                                                | LFH PCR --> 168                                 |
| HB13320                           | 168 <i>amyE::P<sub>spac(hy)</sub>-ytpB (cat)</i>                    | pTK083 --> 168                                  |
| HB13321                           | 168 <i>ytpB::MLS</i>                                                | LFH PCR --> 168                                 |
| HB13346                           | 168 <i>ytpB::MLS amyE::P<sub>spac(hy)</sub>-ytpB (cat)</i>          | chrDNA HB13320 --> HB13321                      |
| HB13348                           | 168 <i>bcrC-pMUTIN</i> (MLS)                                        | chrDNA HB0106 --> 168                           |
| HB13350                           | 168 <i>ytpB::spec</i>                                               | ECE79 --> HB13321                               |
| HB13351                           | 168 <i>ytpB::spec bcrC-pMUTIN</i> (MLS)                             | chrDNA HB0106 --> HB13350                       |
| HB13354                           | 168 <i>ytpB::spec bceAB::kan</i>                                    | chrDNA HB0928 --> HB13350                       |
| HB13355                           | 168 <i>bcrC-pMUTIN</i> (MLS) <i>bceAB::kan</i>                      | chrDNA HB0928 --> HB13348                       |
| HB13356                           | 168 <i>ytpB::spec bcrC-pMUTIN</i> (MLS) <i>bceAB::kan</i>           | chrDNA HB0928 --> HB13351                       |
| HB13358                           | 168 <i>sqhC::MLS</i>                                                | LFH PCR --> 168                                 |
| HB13360                           | 168 <i>sqhC::MLS ytpB::spec</i>                                     | HB13358 chrDNA --> HB13350                      |
| HB13367                           | 168 <i>amyE::P<sub>bceA</sub>-lacZ (cat)</i>                        | pTK099 --> 168                                  |
| HB13369                           | 168 <i>amyE::P<sub>bceA</sub>-lacZ (cat) ytpB::spec</i>             | pTK099 --> HB13350                              |
| HB13387                           | 168 <i>trp</i> <sup>+</sup>                                         | chrDNA HB800 --> 168                            |
| HB13388                           | 168 <i>bceAB::kan trp</i> <sup>+</sup>                              | chrDNA HB800 --> HB0928                         |
| HB13389                           | 168 <i>ytpB::spec trp</i> <sup>+</sup>                              | chrDNA HB800 --> HB13350                        |
| HB13390                           | 168 <i>ytpB::spec bceAB::kan trp</i> <sup>+</sup>                   | chrDNA HB800 --> HB13354                        |
| HB13397                           | 168 <i>amyE::P<sub>spac(hy)</sub>-bceAB (cat)</i>                   | pTK102 --> 168                                  |
| HB13398                           | 168 <i>amyE::P<sub>spac(hy)</sub>-hepSmenHhepT (cat)</i>            | pTK103 --> 168                                  |
| HB13399                           | 168 <i>amyE::P<sub>spac(hy)</sub>-menA (cat)</i>                    | pTK104 --> 168                                  |
| HB13401                           | 168 <i>amyE::P<sub>spac(hy)</sub>-bceAB (cat) ytpB::spec</i>        | chrDNA HB13397 --> HB13350                      |
| HB13402                           | 168 <i>amyE::P<sub>spac(hy)</sub>-hepSmenHhepT (cat) ytpB::spec</i> | chrDNA HB13398 --> HB13350                      |
| HB13403                           | 168 <i>amyE::P<sub>spac(hy)</sub>-menA (cat) ytpB::spec</i>         | chrDNA HB13399 --> HB13350                      |
| HB13438                           | <i>menA::kan</i>                                                    | LFH-PCR --> 168                                 |
| HB13439                           | <i>ytpB::MLS menA::kan</i>                                          | HB 13438 chrDNA --> HB13321                     |
| HB13443                           | 168 <i>uppSI (kan-SD*-uppS) ytpB::MLS</i>                           | HB13321 chrDNA --> HB13648                      |
| HB13447                           | 168 <i>hepT::kan</i>                                                | LFH-PCR --> 168                                 |
| HB13448                           | 168 <i>ytpB::MLS hepT::kan</i>                                      | HB13446 chrDNA --> HB13447                      |
| HB13648                           | 168 <i>uppSI (kan-SD*-uppS)</i>                                     | (Lee and Helmann, 2013)                         |
| HB13649                           | 168 <i>uppSI (kan-SD*-uppS) amyE::P<sub>spac(hy)</sub>.uppS</i>     | (Lee and Helmann, 2013)                         |
| HB17031                           | 168 <i>bcrC-pMUTIN</i> (MLS) <i>trp</i> <sup>+</sup>                | chrDNA HB800 --> HB13348                        |

|         |                                                                    |                            |
|---------|--------------------------------------------------------------------|----------------------------|
| HB17032 | 168 <i>bcrC-pMUTIN(MLS) bceAB::kan trp<sup>+</sup></i>             | chrDNA HB800 --> HB13355   |
| HB17033 | 168 <i>ytpB::spec bcrC-pMUTIN (MLS) trp<sup>+</sup></i>            | chrDNA HB800 --> HB13351   |
| HB17034 | 168 <i>ytpB::spec bcrC-pMUTIN (MLS) bceAB::kan trp<sup>+</sup></i> | chrDNA HB800 --> HB13356   |
| HB17055 | 168 <i>amyE::P<sub>spac(hy)</sub>.uppS (cat)</i>                   | chrDNA HB13649 --> 168     |
| HB17057 | 168 <i>ytpB::spec amyE::P<sub>spac(hy)</sub>.uppS (cat)</i>        | chrDNA HB17055 --> HB13350 |

| Plasmids | Genotype or description                                                                        | Source                                |
|----------|------------------------------------------------------------------------------------------------|---------------------------------------|
| ECE76    | Vector for integration of a <i>cat</i> resistance cassette into a MLS resistance cassette      | (Steinmetz and Richter, 1994)         |
| ECE79    | Vector for integration of a <i>spec</i> resistance cassette into a MLS resistance cassette     | (Steinmetz and Richter, 1994)         |
| pdg1661  | Vector for integration of <i>lacZ</i> fusions at <i>amyE</i>                                   | (Guerout-Fleury <i>et al.</i> , 1996) |
| pPL82    | Vector for IPTG-inducible control of gene expression with integration at the <i>amyE</i> locus | (Quisel <i>et al.</i> , 2001)         |
| pTK083   | pPL82-ytpB                                                                                     | This work                             |
| pTK099   | pDG1661- <i>P<sub>bceA</sub></i> ( <i>cat</i> )                                                | This work                             |
| pTK102   | pPL82- <i>bceAB</i> ( <i>cat</i> )                                                             | This work                             |
| pTK103   | pPL82- <i>hepSmenHhepT</i> ( <i>cat</i> )                                                      | This work                             |
| pTK104   | pPL82- <i>menA</i> ( <i>cat</i> )                                                              | This work                             |

| Oligos | Name                  | Sequence                                      |
|--------|-----------------------|-----------------------------------------------|
| 5170   | ytpA-up-fwd           | GAGAACAGGAAAGAATAGGT                          |
| 5171   | ytpA-up-rev (MLS)     | GAGGGTTGCCAGAGTTAAAGGATCACAATCACGGCAACAGGTCT  |
| 5172   | ytpA-do-fwd (MLS)     | CGATTATGTCTTTTGCAGTCGGCAATGAACCCGAGAGAGAAGAT  |
| 5173   | ytpA-do-rev           | AGGCTGGAACGAATACGCAA                          |
| 5856   | ytpB-up-fwd           | TCATGTGGACCTGGAAAGCA                          |
| 5857   | ytpB-up-rev (MLS)     | GAGGGTTGCCAGAGTTAAAGGATCGTCCAGCTCTTGATGAACGA  |
| 5858   | ytpB-do-fwd (MLS)     | CGATTATGTCTTTTGCAGTCGGCGGGCTTGCTTGGCGTTTA     |
| 5859   | ytpB-do-rev           | TGATCGTCCACCGCATTACA                          |
| 5860   | ytpB up XmaI          | TCAGCCCGGGGAACCCGAGAGAGAAGATGT                |
| 5861   | ytpB do XbaI          | AGTCTCTAGATCAATTACGACAAACGGCAGT               |
| 5944   | PbceA Forward EcoRI   | GATCGAATTCGAACATGTCATAAGCGTGTGACG             |
| 5945   | PbceA Reverse BamHI   | GATCGGATCCTATCGATGCCCTCAGCACTCC               |
| 5958   | sqhC upstream F       | GCCTTTACCGGTTCCACTGA                          |
| 5959   | sqhC upstream R       | GAGGGTTGCCAGAGTTAAAGGATCCGCCTCACTTTCTCCTGAAGT |
| 5960   | sqhC downstream F MLS | CGATTATGTCTTTTGCAGTCGGCGGAGACAGCAAATGAAACGTGA |
| 5961   | sqhC downstream R     | CCACGACATTCCACCAGTGA                          |
| 5977   | hepST UbiE F XmaI     | GATCCCGGGTGTGAATTTGGGGACAAGGGT                |
| 5978   | hepST UbiE R XbaI     | GATCTCTAGATTAATCAATCCGGGGCGGAG                |

|      |                   |                                                  |
|------|-------------------|--------------------------------------------------|
| 5979 | bceAB F XmaI      | GATCCCCGGGTATCCAATATAAAGGAGACTGCGT               |
| 5980 | bceAB R XbaI      | GATCTCTAGAACAACCGATCCGGCTGAAAT                   |
| 5983 | menA F XmaI       | GATCCCCGGGTTTTAATAGAAAAGGAAGAGGAA                |
| 5984 | menA R XbaI       | GATCTCTAGACAAAATGCGGTTCGATTGTAA                  |
| 6132 | menA up fwd       | CCGTACACAAGGATAGGAGA                             |
| 6133 | menA up rev (kan) | CCTATCACCTCAAATGGTTCGCTGGCCAAAGGATCTGCCCCAT      |
| 6134 | menA do fwd (kan) | CGAGCGCCTACGAGGAATTTGTATCGCTGGGTTGTCGGCTTGGTT    |
| 6135 | menA do rev       | GAAGGCGAAAGCATCTGACA                             |
| 6136 | hepT up fwd       | CGGCTTATGAACGGAAATGAT                            |
| 6137 | hepT up rev (kan) | CCTATCACCTCAAATGGTTCGCTGCATCTGTGTTTTTCATTCCATC   |
| 6138 | hepT do fwd (kan) | CGAGCGCCTACGAGGAATTTGTATCGTATGGCAGTAAGCGAAATGTAT |
| 6139 | hepT do rev       | CGTTGGGAAAGGCAGAGGT                              |

<sup>a</sup>Abbreviations used: chrDNA indicates chromosomal DNA, LFH-PCR indicates long-flanking homology PCR, --> indicates genetic transformation.

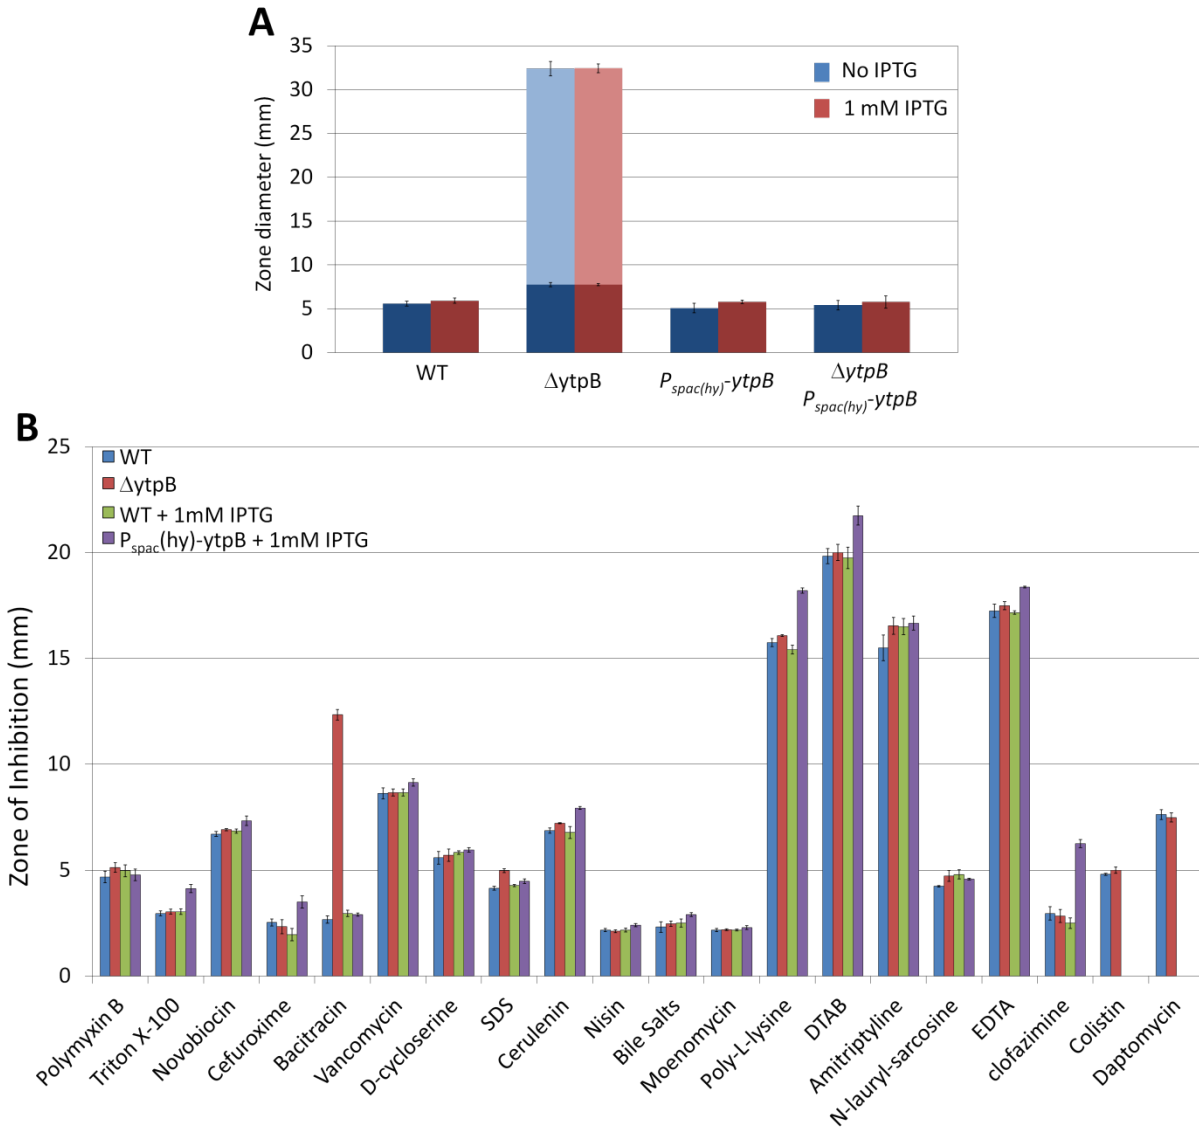

**Figure S1:** *ytpB* primarily confers resistance against bacitracin. (A) Bacitracin sensitivity of the WT (168),  $\Delta ytpB$  (HB13321),  $P_{spac(hy)}-ytpB$  (HB13320), and  $P_{spac(hy)}-ytpB \Delta ytpB$  (HB13346) strains as measured with a disk diffusion assay. Bacitracin sensitivity in the  $\Delta ytpB$  background reverts to wild type upon the introduction of the  $P_{spac(hy)}-ytpB$  fusion even in the absence of IPTG induction. (B) The WT (168),  $\Delta ytpB$  (HB13129), and  $P_{spac(hy)}-ytpB$  (HB13320) strains were assessed for sensitivity to the indicated stresses on MH media supplemented with or without 1 mM IPTG. The  $\Delta ytpB$  strain exhibited a large sensitivity phenotype to bacitracin (seen as a zone of early lysis; see text), but was not significantly more sensitive to the other stresses tested. Small but significant sensitivity phenotypes were observed for the  $P_{spac(hy)}-ytpB$  strain to triton X-100, cefuroxime, cerulenin, poly-L-lysine, dodecyltrimethylammonium bromide (DTAB), EDTA, and clofazimine.

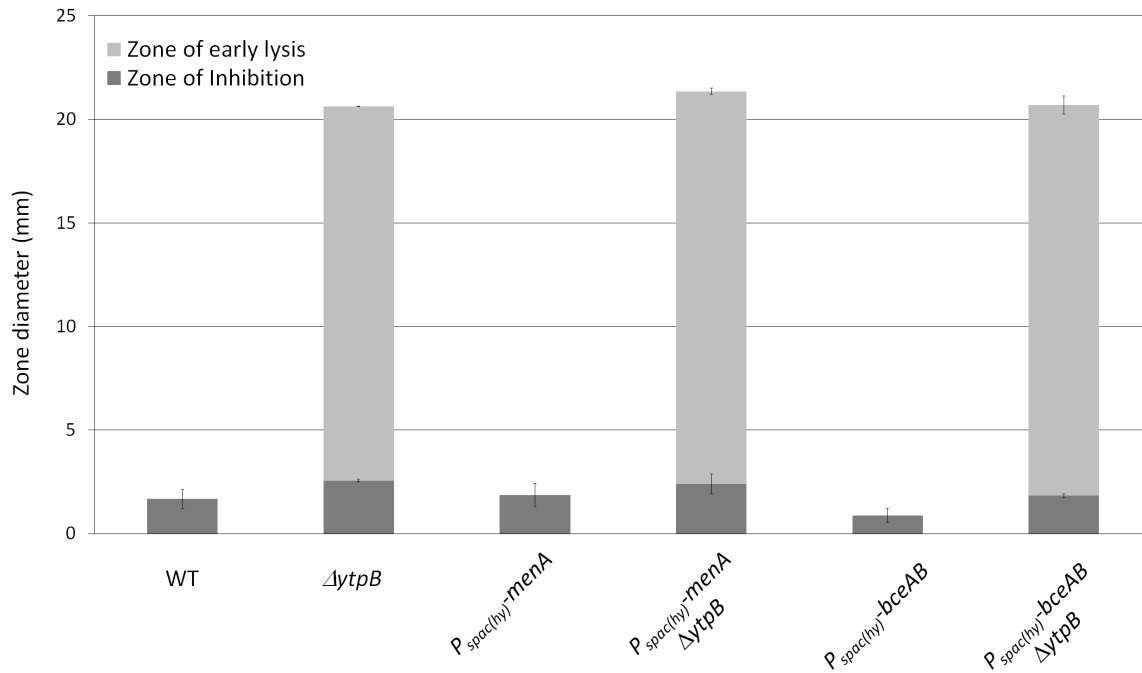

**Figure S2:** Bacitracin disk diffusion assays of WT (168),  $\Delta ytpB$  (HB13350),  $P_{spac(hy)}-menA$  (HB13399),  $P_{spac(hy)}-menA \Delta ytpB$  (HB13403),  $P_{spac(hy)}-bceAB$  (HB13397), and  $P_{spac(hy)}-bceAB \Delta ytpB$  (HB13401) strains on MH medium supplemented with 1 mM IPTG. For this assay, bacitracin was used instead of bacitracin zinc. Overexpressing *menA* has no significant effect on bacitracin sensitivity. Overexpressing *bceAB* slightly decreased the bacitracin zone of inhibition in WT cells but did not affect sensitivity in  $\Delta ytpB$  cells.

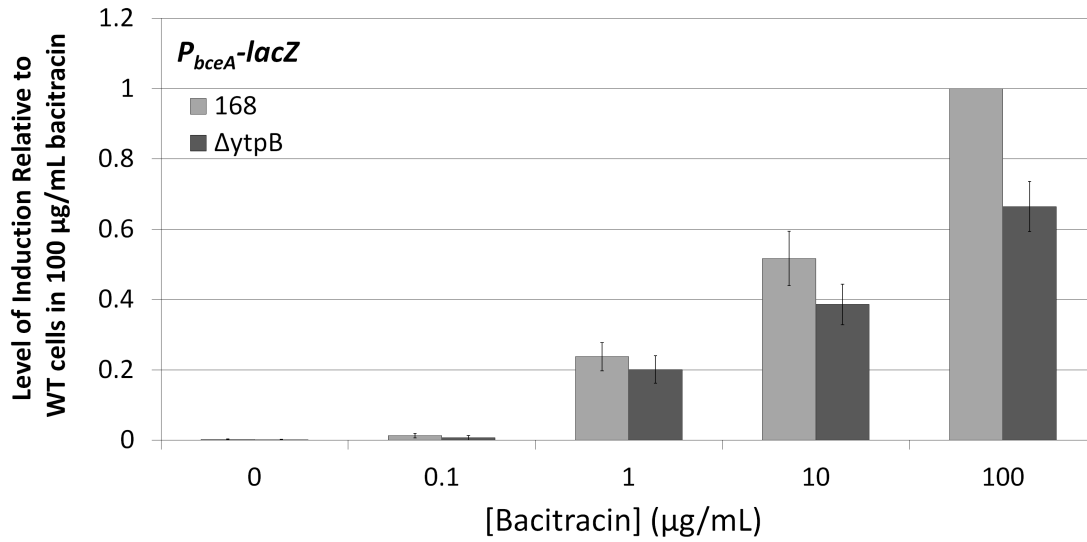

**Figure S3.** Induction of expression of *bceAB* by bacitracin in WT and  $\Delta ytpB$  backgrounds.  $\beta$ -galactosidase assays were used to measure the activity of a  $P_{bceA-lacZ}$  construct in WT (HB13367) and  $\Delta ytpB$  (HB13369) cells with bacitracin concentrations ranging from 0.1-100  $\mu\text{g ml}^{-1}$ .

## References

- Cao, M. and Helmann, J.D. (2002) Regulation of the *Bacillus subtilis* *bcrC* bacitracin resistance gene by two extracytoplasmic function  $\sigma$  factors. *J Bacteriol* **184**: 6123-6129.
- Guerout-Fleury, A.-M., Frandsen, N., and Stragier, P. (1996) Plasmids for ectopic integration in *Bacillus subtilis*. *Gene* **180**: 57-61.
- Lee, Y.H. and Helmann, J.D. (2013) Reducing the level of undecaprenyl pyrophosphate synthase has complex effects on susceptibility to cell wall antibiotics. *Antimicrob Agents Ch* **57**: 4267-4275.
- Mascher, T., Margulis, N.G., Wang, T., Ye, R.W., and Helmann, J.D. (2003) Cell wall stress responses in *Bacillus subtilis*: the regulatory network of the bacitracin stimulon. *Mol Microbiol* **50**: 1591-1604.
- Quisel, J.D., Burkholder, W.F., and Grossman, A.D. (2001) *In vivo* effects of sporulation kinases on mutant Spo0A proteins in *Bacillus subtilis*. *J Bacteriol* **183**: 6573-6578.
- Steinmetz, M. and Richter, R. (1994) Plasmids designed to alter the antibiotic resistance expressed by insertion mutations in *Bacillus subtilis*, through *in vivo* recombination. *Gene* **142**: 79-83.
